# Supplementary material for: Polyvinyl chloride degradation by a bacterium isolated from the gut of insect larvae
Source: PubMed Central journal article supplement (PMC9468159; doi:10.1038/s41467-022-32903-y), 2022-09-12
Supplement: 41467_2022_32903_MOESM1_ESM.pdf [file 41467_2022_32903_MOESM1_ESM.pdf]

# **SUPPLEMENTARY MATERIAL for**

## **Polyvinyl chloride degradation by a bacterium isolated from the gut of insect larvae**

### **\*Corresponding author:**

Dr. Feng Ju, Westlake University

Tel.: 571-87963205 (lab), 571-87380995 (office)

E-mail: jufeng@westlake.edu.cn; richieju520@gmail.com

### **Supplementary Tables and Figure Legends**

**Supplementary Table 1 Detection and analysis results of additives in PVC film by GC-MS analysis**

**Supplementary Figure 1 Characterization of morphological changes of PVC film in the feces of *Spodoptera frugiperda* larva**

**Supplementary Figure 2 Screening and isolation of PVC film degrading strains and phylogenetic analysis of 16S rRNA gene sequence**

**Supplementary Figure 3 Degradation results of strain EMBL-1 on PVC film**

**Supplementary Figure 4 Spectrum of NMR experiments of PVC**

**Supplementary Figure 5 Detection results of degradation products of PVC film by GC-MS**

**Supplementary Figure 6 Detection and identification results of additives in PVC film and the degradation activity of strain EMBL-1s on main additives**

**Supplementary Figure 7 The whole-genome map of strain EMBL-1**

**Supplementary Figure 8 Results of proteome experiments and expression purification of catalase-peroxidase**

**Supplementary Figure 9 Physicochemical characterization of PVC degradation by**

26 **catalase-peroxidase**

27 **Supplementary Figure 10 Potential degradation products detection of PVC by catalase-**  
28 **peroxidase**

29 **Supplementary Tables and Figures**

30 **Supplementary Table 1 Detection and analysis results of additives in PVC film by GC-**

31 **MS analysis**

| <b>Name</b> | <b>RT/min</b> | <b>Qualitative and<br/>quantitative<br/>transition</b> | <b>Standard curve/R<sup>2</sup></b> | <b>Content in<br/>PVC film (%)</b> |
|-------------|---------------|--------------------------------------------------------|-------------------------------------|------------------------------------|
| DOA         | 11.78         | 129,57,112/129                                         | $y=2E+06x-226835$ , $R^2=0.9925$    | 22.90                              |
| DOTP        | 14.53         | 70,112,149/70                                          | $y=952890x-2E+06$ , $R^2=0.9935$    | 5.23                               |
| Erucylamide | 15.09         | 59,72,55/59                                            | $y=523400x-1E+06$ , $R^2=0.9936$    | 2.05                               |

32

33 **Supplementary Figure 1 Characterization of morphological changes of PVC film in the**  
34 **feces of *Spodoptera frugiperda* larva**

35 a, Scanning electron microscopy (SEM) results showing clear degradation of PVC film  
36 recovered from larval feces in PVC group. b, SEM results showing no visible biodegradation  
37 of PVC film recovered from feces in Antibiotic group (in which gentamicin antibiotic was  
38 used to inactivate most gut microbes of the larva). For both a and b, subfigure (1) to (4)  
39 represented the degradation of PVC film from low magnification to high magnification in SEM.  
40 At least 3 times experiment was repeated independently.

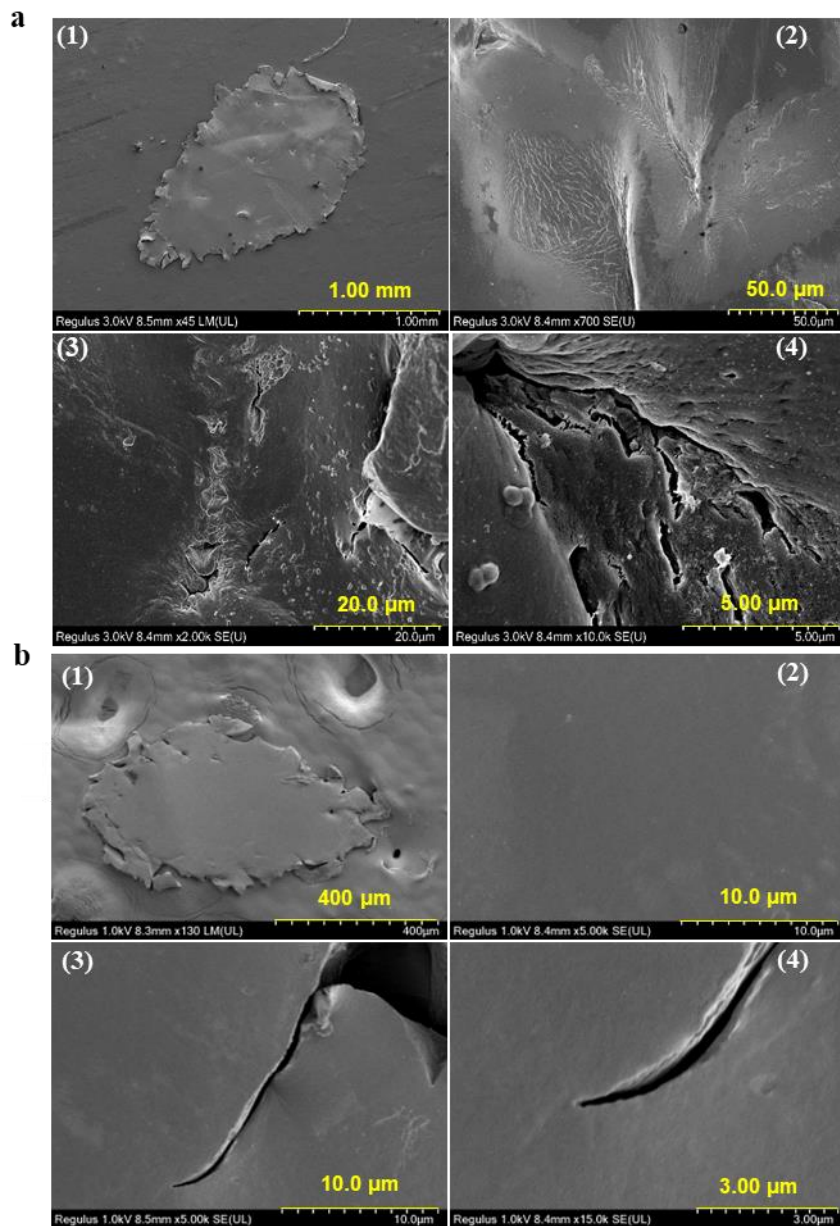

42 **Supplementary Figure 2 Screening and isolation of PVC film degrading strains and**  
43 **phylogenetic analysis of 16S rRNA gene sequence**

44 a, Experimental screening and isolation (The dissected intestine of larva in PVC group was  
45 used to inoculate and enrich for degrading strain EMBL-1, which was cultured on PVC film  
46 in MSM liquid medium and LB solid medium). b, Phylogenetic tree of 16S rRNA gene  
47 sequences showing PVC-degrading strain EMBL-1 as a novel *Klebsiella* strain most closely  
48 related to *Klebsiella variicola* and *Klebsiella pneumoniae* (The analysis was conducted using  
49 the Fast Minimum Evolution method at a maximum sequence difference of 0.75).

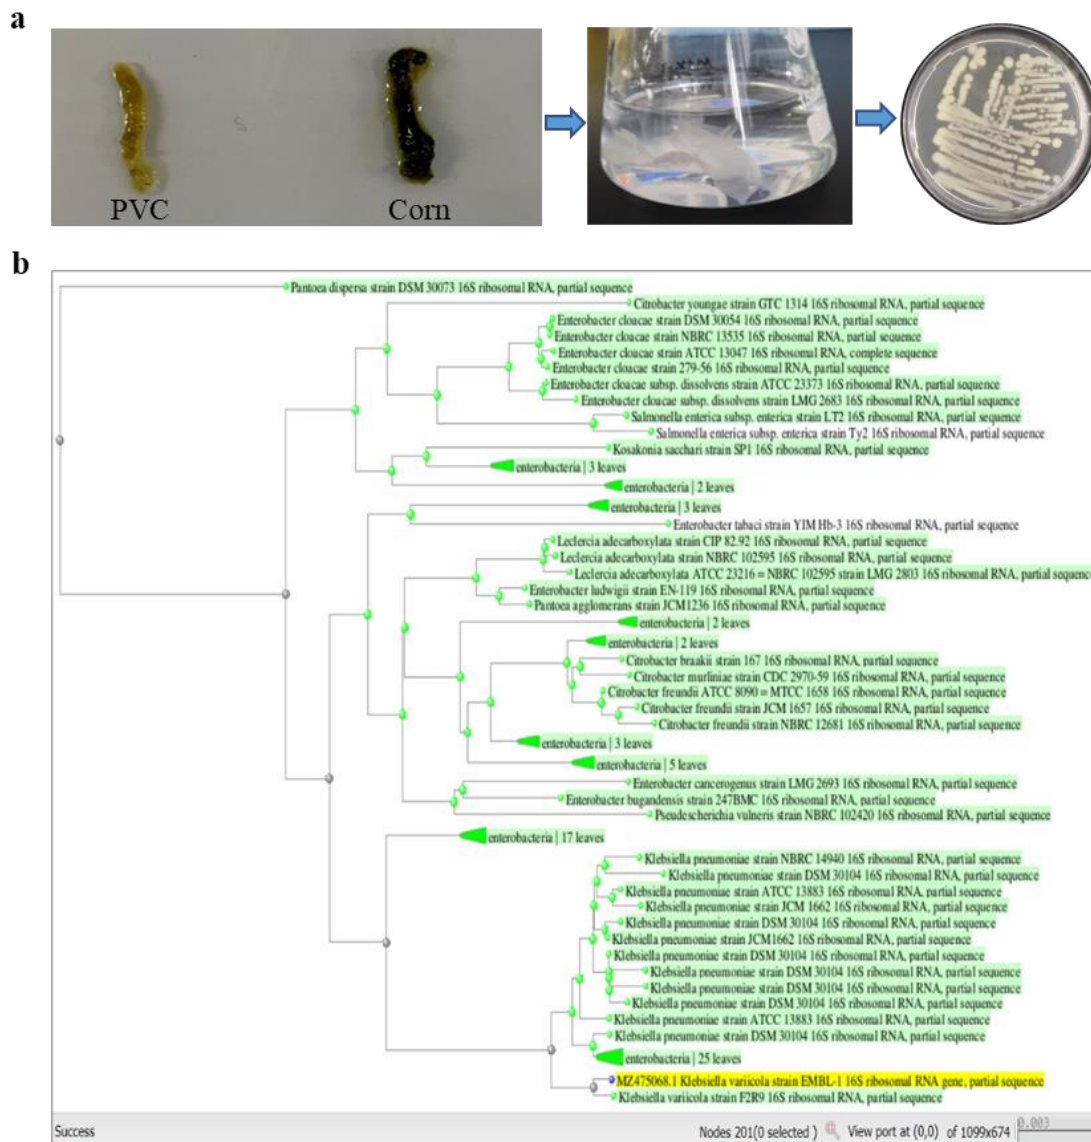

51 **Supplementary Figure 3 Degradation results of strain EMBL-1 on PVC film**

52 a, SEM images of the cracks and pits formed on the PVC film by strain EMBL-1 on day 90.  
53 At least 3 times experiment was repeated independently. b, Water contact angle of PVC film  
54 after co-culturing with strain EMBL-1 significantly decreased compared with the control  
55 group (t-test  $P < 0.05$ ,  $n = 3$  samples each). c, Tensile strength of PVC film in the control group  
56 and the EMBL-1 group after 90 days. d,  $OD_{600}$  values during 65-day growth of strain EMBL-  
57 1 using soybean oil (SO) as the sole organic carbon substrate, which showed no growth of  
58 strain EMBL-1 compared with the control groups. Each group had 3 replicates and the mean  
59 values were visualized. e-f, Thermal gravimetric analysis (TGA) results of PVC film in control  
60 and EMBL-1 groups during 90 days. g, FTIR results of PVC film in control groups during 90  
61 days. Source data are provided as a Source Data file.

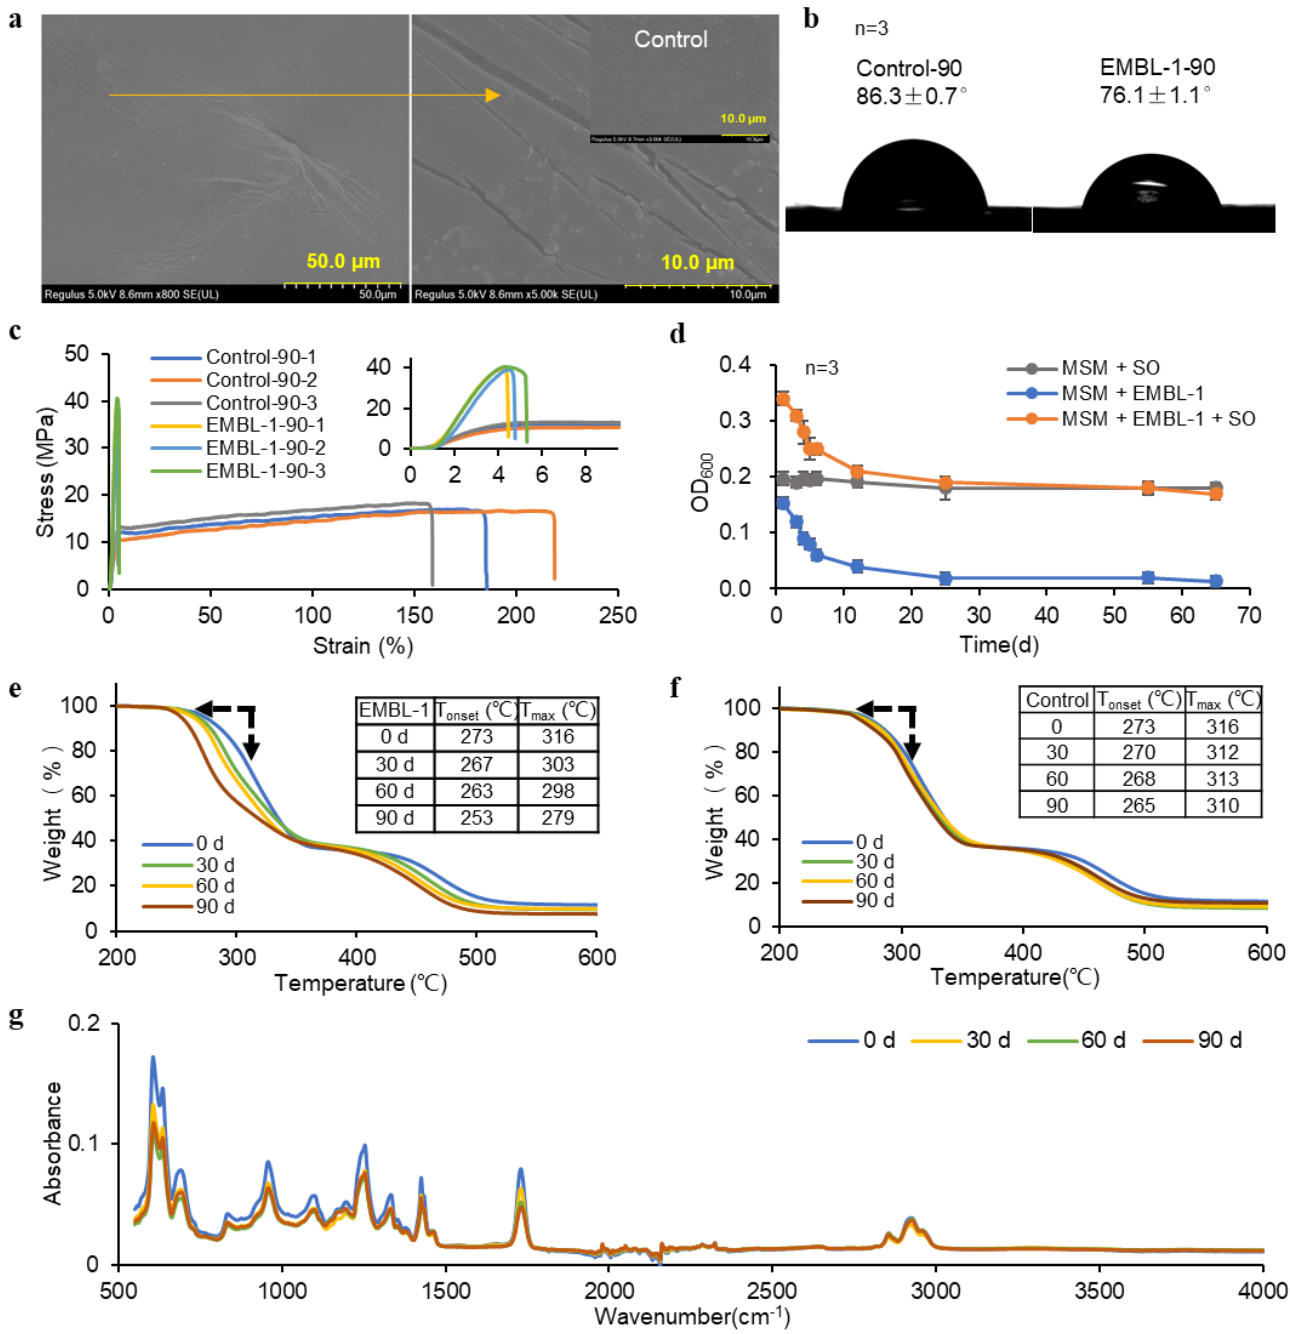

63 **Supplementary Figure 4 Spectrum of NMR experiments of PVC**

64 a, DOSY Spectrum of pure PVC in control and EMBL-1 group on 90 days. b, 2D  $^1\text{H}$ - $^1\text{H}$  COSY  
65 spectrum of pure PVC in EMBL-1 group on 90 days. c, 2D  $^1\text{H}$ - $^1\text{H}$  NOESY spectrum of pure  
66 PVC in EMBL-1 group on 90 days. d, 2D  $^1\text{H}$ - $^{13}\text{C}$  HSQC spectrum of pure PVC in EMBL-1  
67 group on 90 days. e, 2D  $^1\text{H}$ - $^{13}\text{C}$  HMBC spectrum of pure PVC in EMBL-1 group on 90 days.

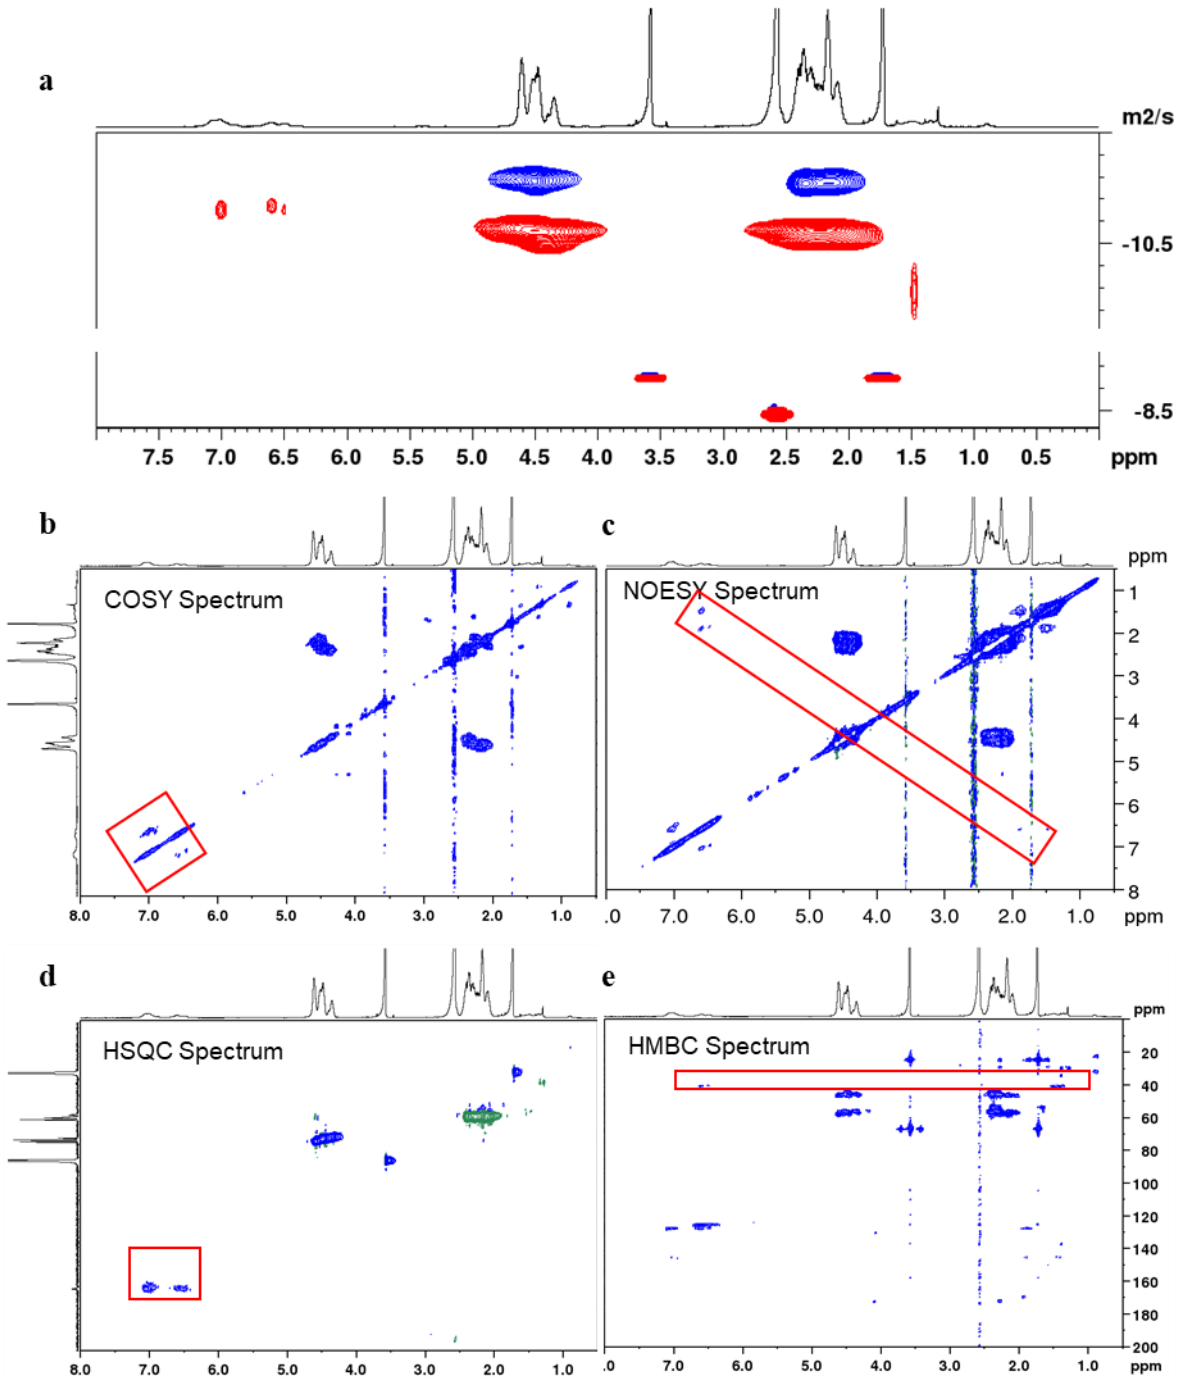

68  
69  
70



71 **Supplementary Figure 5 Detection results of degradation products of PVC film by GC-**  
72 **MS**

73 a, the TIC diagram of degradation products of PVC film in two groups by the time of 90 d. b-  
74 f, the mass spectrum and structural formula of the potential degradation products 1-5.

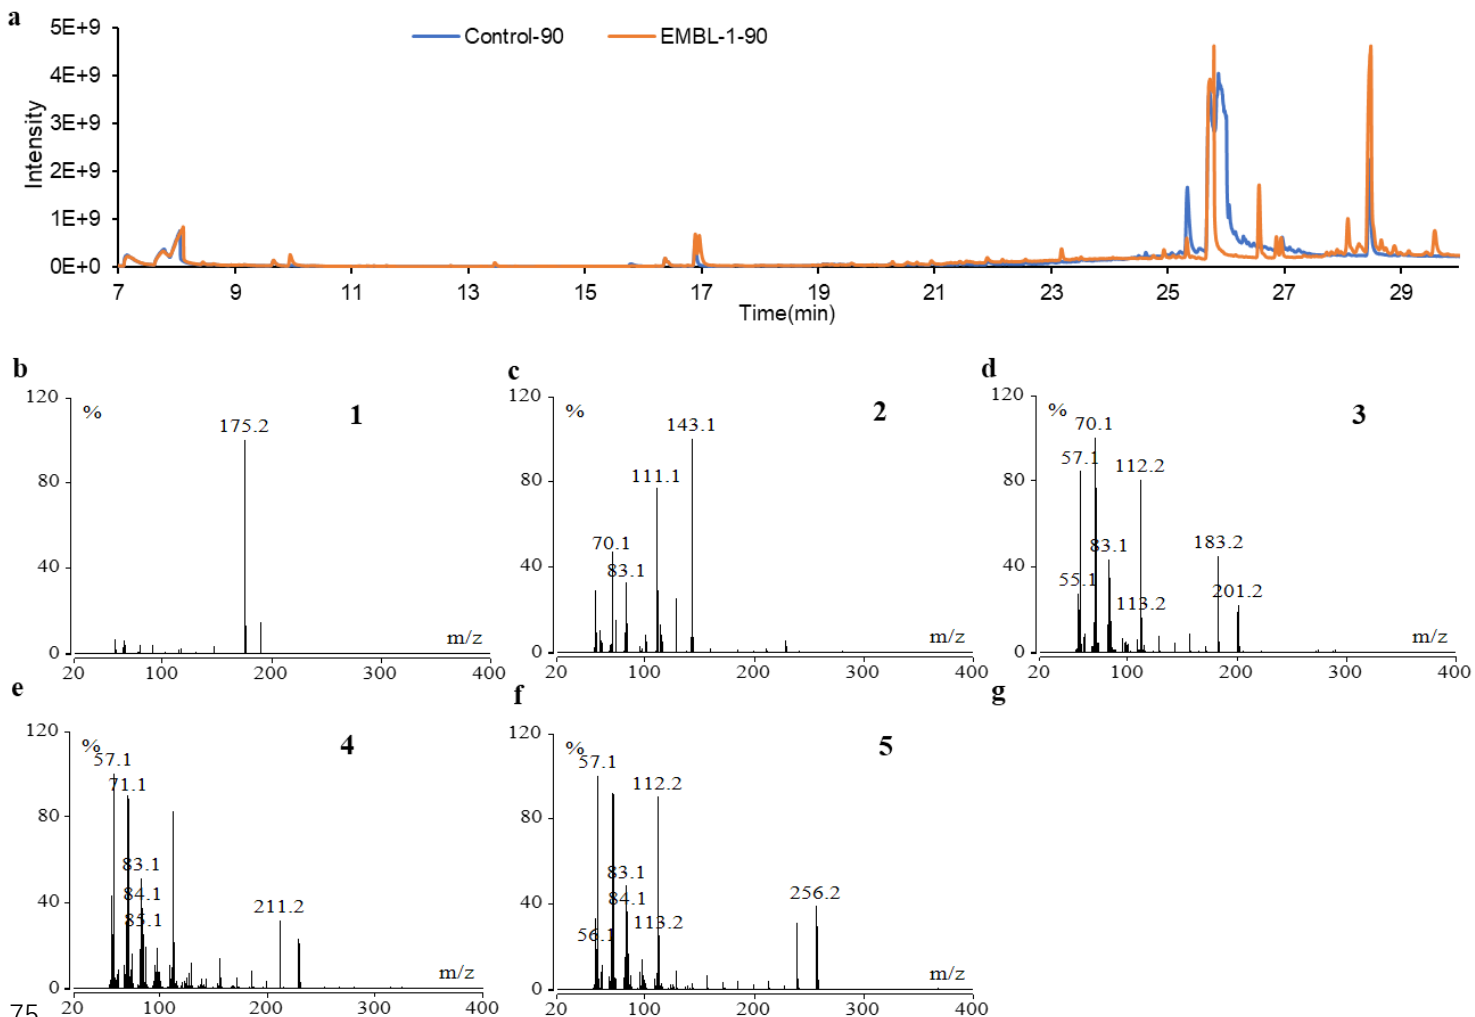

75  
76

77 **Supplementary Figure 6 Detection and identification results of additives in PVC film and**  
 78 **the degradation activity of strain EMBL-1 on main additives**

79 a, the Py/GC-MS diagram of three additives in PVC film. b, the TIC diagram of three additives  
 80 identification in PVC film. c-e, the mass spectrum of three additives. f, the result of  
 81 degradation activity of strain EMBL-1 on three additives. The experiments were conducted in  
 82 triplicates, and mean value  $\pm$  standard deviation was visualized.

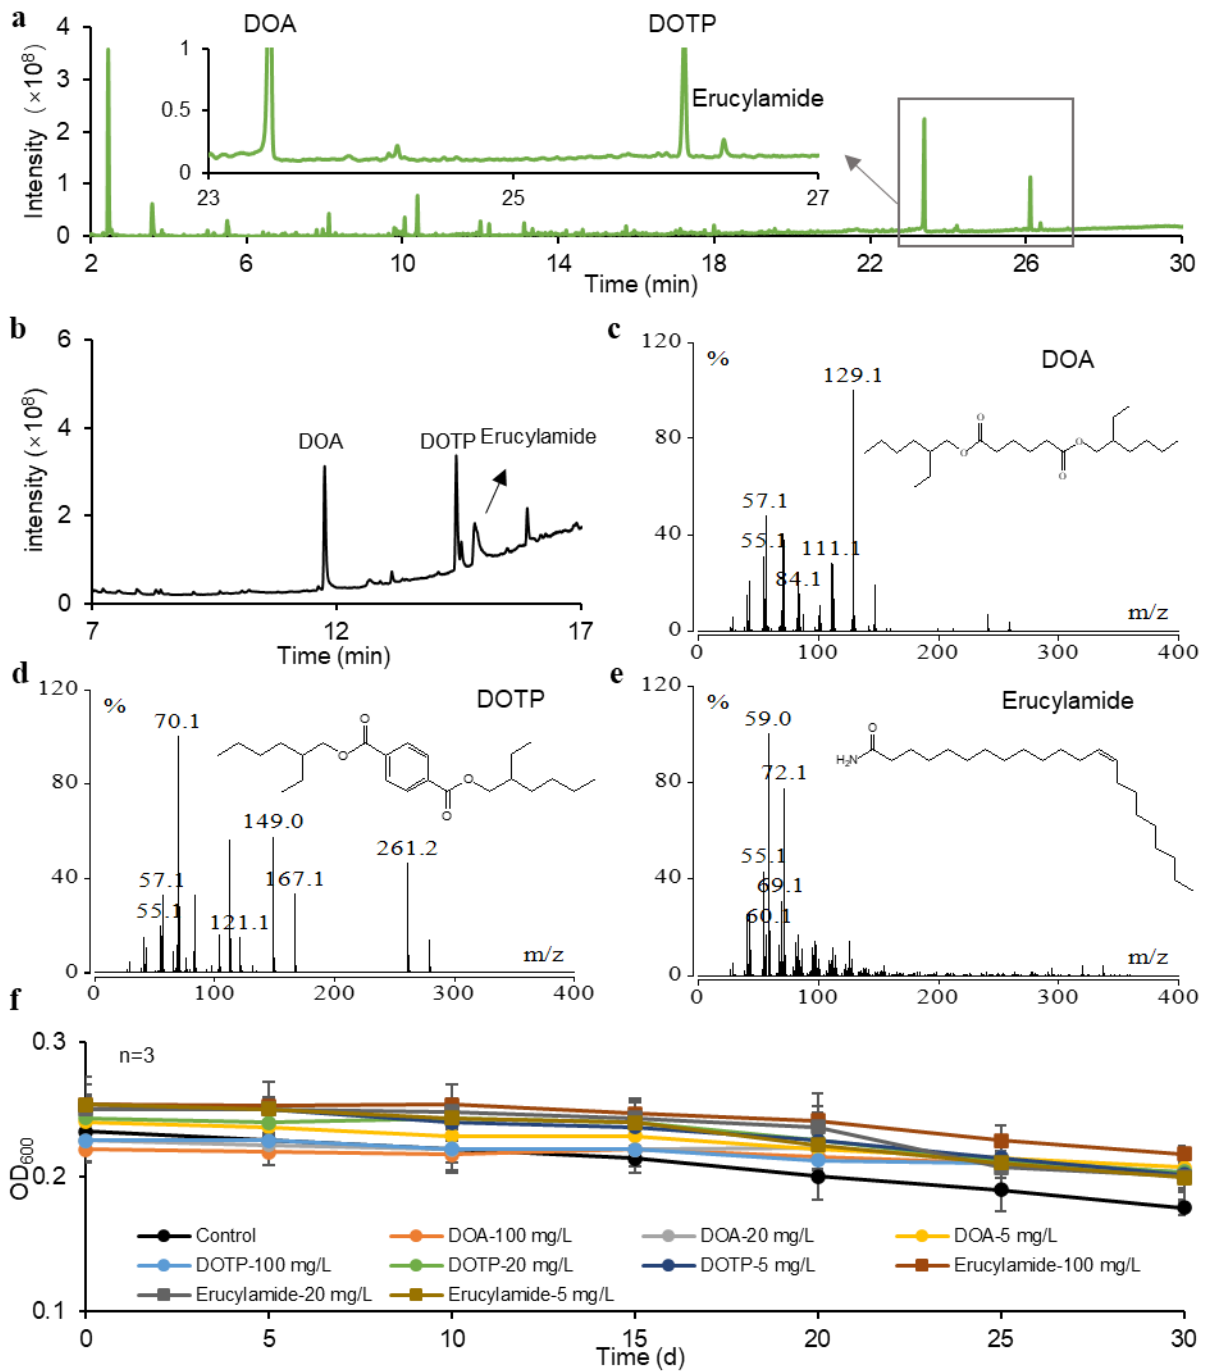

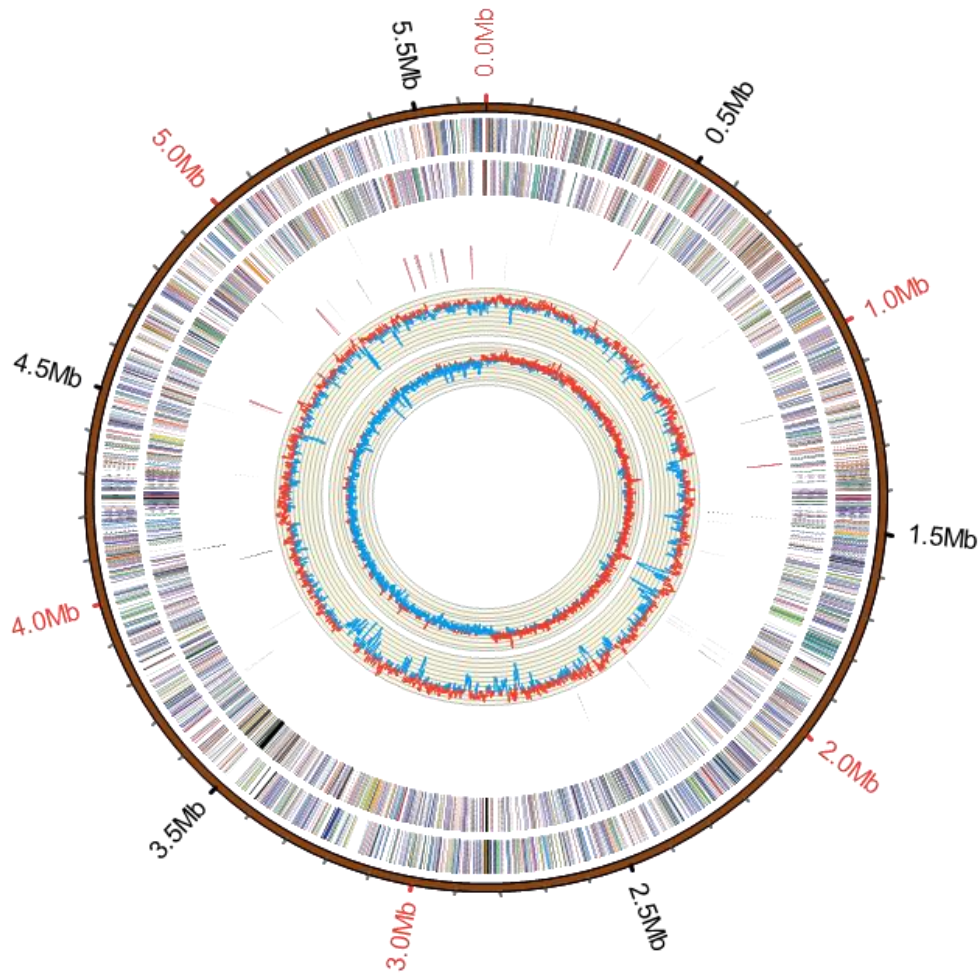

85

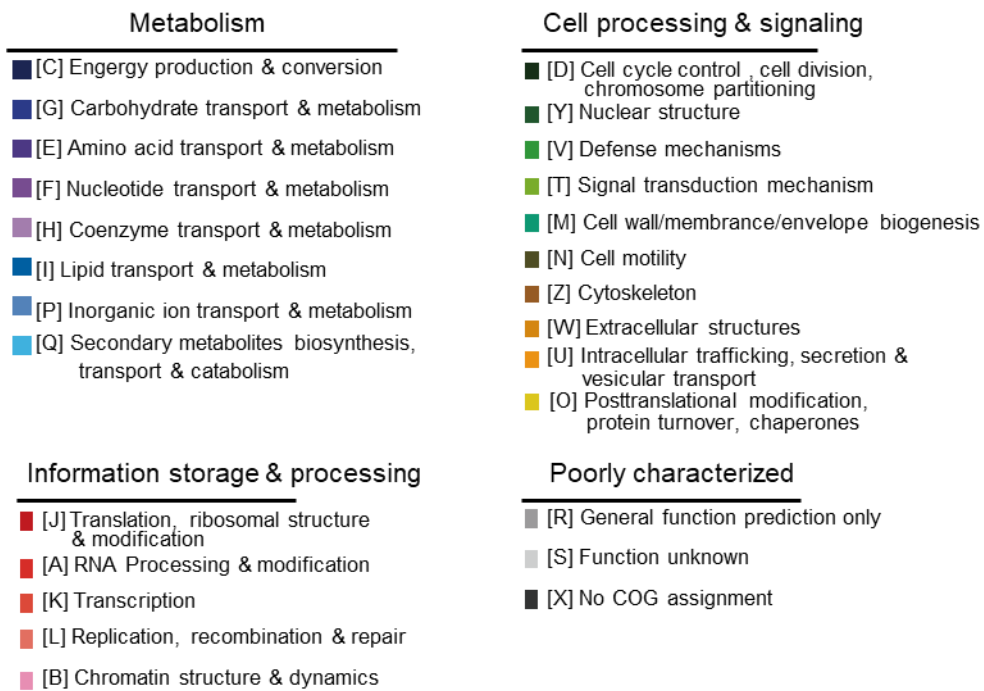

86

87 **Supplementary Figure 8 Results of proteome experiments and expression purification of**  
88 **catalase-peroxidase**

89 a, Growth curve of strain EMBL-1 under different carbon source conditions. b, The  
90 concentration of proteins in four groups detected by Bradford method. c, Construction results  
91 of expression strain of catalase-peroxidase (M means protein marker, 1 means the strain lysate  
92 before induction, 2 means the strain lysate after induction). d, purification results of catalase-  
93 peroxidase using Ni-IDA Agarose Magnetic Beads (M means protein marker, 1 means the  
94 strain lysate after induction, 2-3 mean the elution during purification, 4 means the elution  
95 with catalase-peroxidase). For a and b, the experiments were conducted in triplicates, and mean  
96 value  $\pm$  standard deviation was visualized. For c and d, the experiments were repeated at least  
97 3 times independently. Source data were provided as a Source Data file.

98

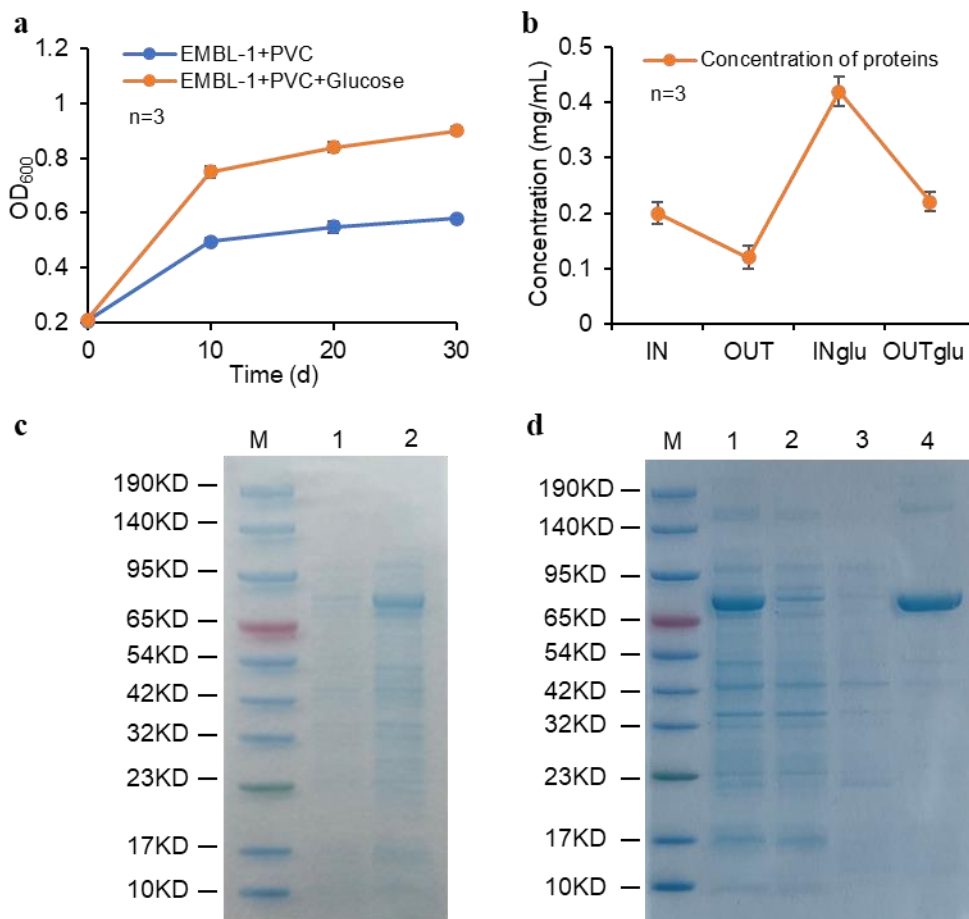

99  
100

101 **Supplementary Figure 9 Physicochemical characterization of PVC degradation by**  
102 **catalase-peroxidase**

103 a, FTIR results for PVC in the PVC-Cp group and PVC control group. b, Molecular weight of  
104 PVC in the PVC-catalase-peroxidase group and PVC control group. The experiments were  
105 conducted in triplicates and mean value  $\pm$  standard deviation was visualized. Source data were  
106 provided as a Source Data file.

107

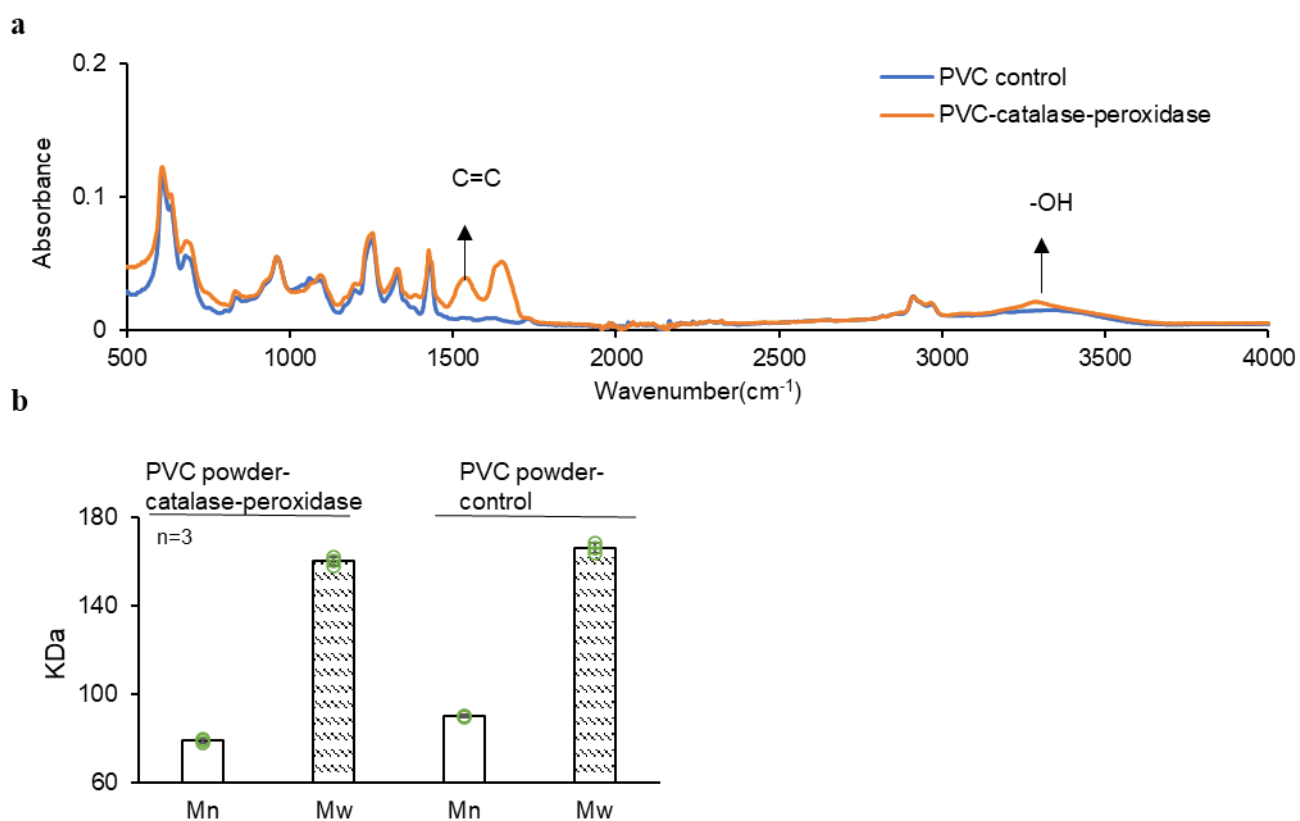

108

109

110 **Supplementary Figure 10 Potential degradation products detection of PVC by catalase-**  
111 **peroxidase**

112 a, The detection results of GC-MS of degradation products from PVC-catalase-peroxidase  
113 group and PVC control group. b, the mass spectrum and structural formula of the potential  
114 degradation products.

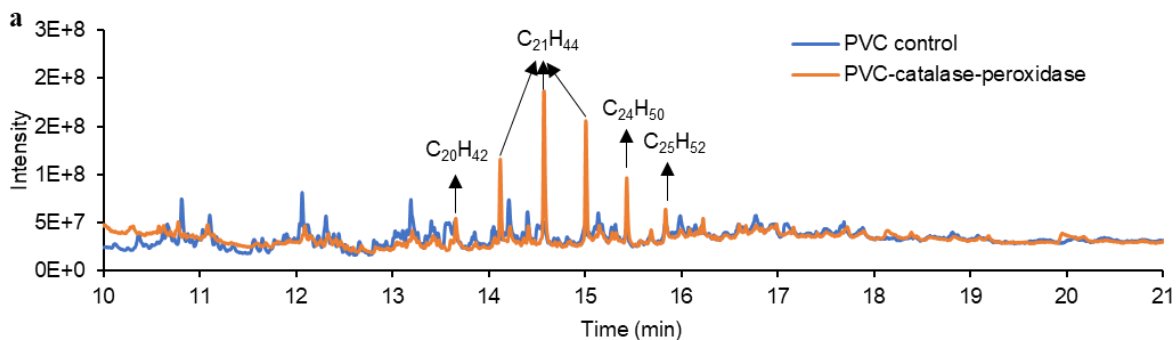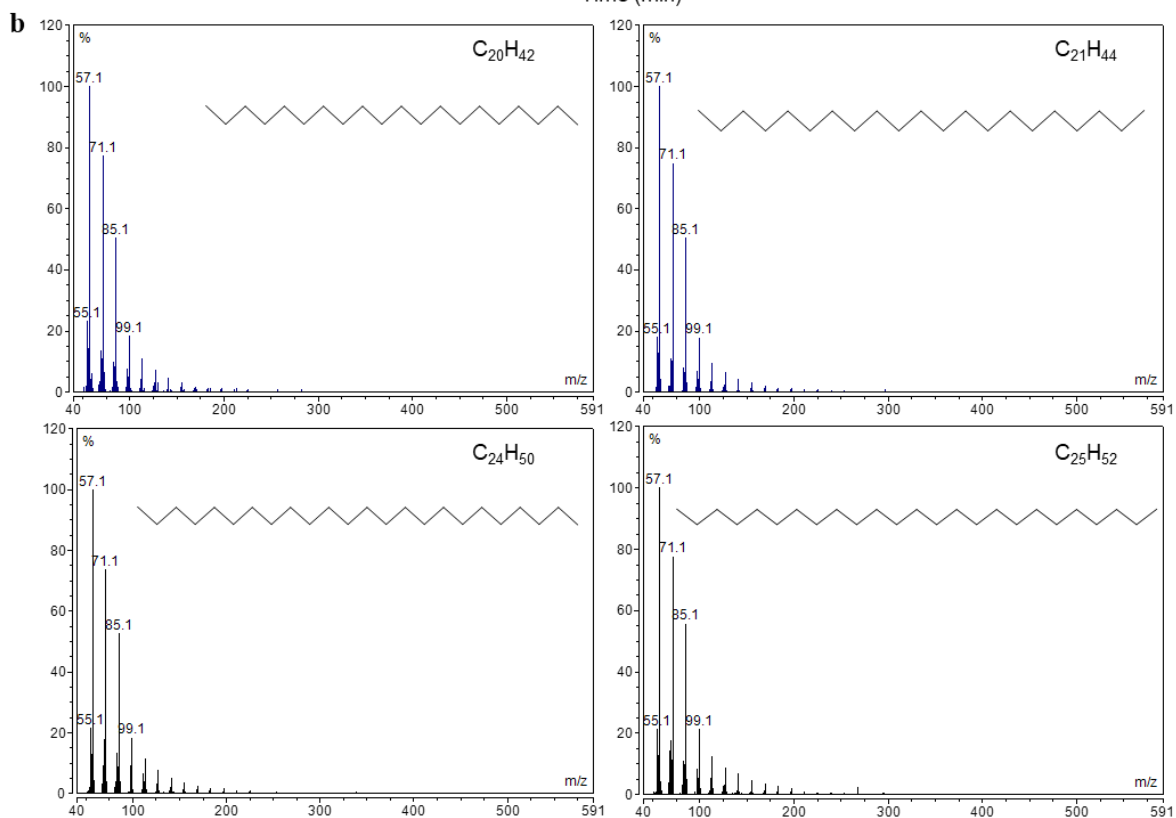

115  
116
