# Supplementary material for: Polyvinyl chloride degradation by a bacterium isolated from the gut of insect larvae
Source: PubMed Central journal article supplement (PMC9468159; doi:10.1038/s41467-022-32903-y), 2022-09-12
Supplement: 41467_2022_32903_MOESM3_ESM.pdf [file 41467_2022_32903_MOESM3_ESM.pdf]

**Title:** Supplementary Data 1.

**Description:** Annotated results of the genome sequencing data of EMBL-1 strain.

**Title:** Supplementary Data 2.

**Description:** The analysis data of mass spectrometry of proteins of different treatment groups.  
Reference genome (*Klebsiella variicola* 118)

**Title:** Supplementary Data 3.

**Description:** The transcriptome sequencing analysis data of EMBL-1 strain degrading PVC film under different culture conditions (Reference genome (*Klebsiella variicola* FH-1), up-regulated genes of EMBL-1 genomes in the group with PVC film as the only carbon source)
